# Supplementary material
Source: Royal Society of Chemistry journal article supplement (doi:10.1039/d6ta02559e)
Supplement: d6ta02559e1.pdf [file d6ta02559e1.pdf]

## Supplementary Information

# Probing Ag filamentary networks in a neuromorphic device using surface-enhanced Raman scattering

Tejaswini S. Rao<sup>1</sup>, Giridhar U. Kulkarni<sup>1,\*</sup>

<sup>1</sup>Chemistry & Physics of Materials Unit, Jawaharlal Nehru Centre for Advanced Scientific Research, Jakkur P.O., Bangalore-560064, India

\* Corresponding Author & Email Address: Prof. Giridhar U. Kulkarni (kulkarni@jncasr.ac.in)

### Table of contents

Table S1: Comparison table of techniques used to probe conductive Ag filamentary pathways in Ag-based devices

Figure S1: Ag-ASN device fabrication protocol

Figure S2: Conduction mechanism in HRS and LRS elucidated using an I-V sweep

Figure S3: Schematic of the mechanism

Figure S4: Region of sharp curvatures and histogram showing inter-particle distances

Figure S5: Photograph of the experimental setup

Figure S6: I-V sweeps and the corresponding  $V_{th}$  and  $V_{hold}$  distributions under different RH conditions

Figure S7: Histograms for the distribution of HRS at different RH

Figure S8: I-V sweeps and the corresponding  $V_{th}$  and  $V_{hold}$  distributions in the O<sub>2</sub> atmosphere

Figure S9: Response of the device when cycled between different atmospheres

Figure S10: Conductance (G) state retention post pulsing with varying  $I_{CC}$  and number of pulses ( $N_p$ ) in the N<sub>2</sub> atmosphere

Figure S11: Conductance state retention post pulsing with varying  $I_{CC}$  and number of pulses ( $N_P$ ) at 45% and 75% RH

Figure S12: Conductance state retention post pulsing with varying  $I_{CC}$  and number of pulses ( $N_P$ ) in the  $O_2$  atmosphere

Figure S13: Summary of the retention behavior with varying  $I_{CC}$  and the number of pulses ( $N_P$ ) in different atmospheric conditions

Figure S14: Quantum conductance during voltage pulsing in different atmospheres and mirror pulsing at 75% RH

Figure S15: Energy consumption per synapse in different atmospheres

Note S1: Energy consumption calculation

Note S2: Redox reactions at higher humidities

Figure S16: Raman spectra in the  $N_2$  atmosphere and at 85% RH on the Ag-ASN devices  $D_{ab}$  and  $D_{cd}$

Figure S17: Spatial variation of SERS signal intensities

Note S3: SERS factor calculation

Figure S18: SERS factor variation in the  $N_2$  atmosphere, 55%, and 85% RH for characteristic thiophenol peaks

Figure S19: FESEM images of  $D_{cd}$  that has not been subjected to electric field treatment in the  $N_2$  atmosphere, 55%, and 85% RH

Figure S20: FESEM images of  $D_{ab}$  that has been subjected to electric field treatment at 55% RH

Figure S21: Elemental EDS mapping on the dendritic growth between Ag particles

Figure S22: Filamentary path formation in the device pulsed at 55% RH

Figure S23: Location-wise microscopy and SERS on the  $D_{ab}$  at 55% RH

Figure S24: FESEM images of  $D_{ab}$  that has been subjected to electric field treatment at 85% RH

Figure S25: Sample preparation process for TEM characterization

Figure S26: TEM and HRTEM images of the Ag structures treated electrically at high humidity and subjected to SERS studies

Note S4: Details on the spider chart

Figure S27: Photograph of the in situ SERS setup

Figure S28: Raman spectra and the corresponding peak intensities at two different locations in the in situ measurement

**Table S1:** Comparison table of techniques used to probe conductive Ag filamentary pathways in Ag-based devices

| Device geometry (vertical/lateral) | Device structure/ Active material            | Technique used        | What it probed                                                                                                                                                                                                                                                                                       | Requires special sample preparation | Invasive / non invasive | In situ/ ex situ/ in operando | Ref |
|------------------------------------|----------------------------------------------|-----------------------|------------------------------------------------------------------------------------------------------------------------------------------------------------------------------------------------------------------------------------------------------------------------------------------------------|-------------------------------------|-------------------------|-------------------------------|-----|
| Vertical                           | $\alpha$ -Si/Ag/Cu                           | C-AFM                 | multiple and spatially distributed conductive filaments                                                                                                                                                                                                                                              | No                                  | Non invasive            | In situ                       | 1   |
| Lateral                            | Ag/CuO nanowires/ Au                         | TEM                   | direct evidence of Ag <sup>+</sup> ion migration and conductive filament formation, governed by electrochemical metallization, the interplay of intrinsic defects, such as axial grain boundaries, with Ag nanoparticle nucleation, underscoring their critical role in facilitating filament growth | Yes                                 | Invasive                | In situ                       | 2   |
| Lateral                            | Au/Ag@TiO <sub>2</sub> nanowire networks/ Au | Infrared thermography | fundamental aspects of signal transmission in neuromorphic nanowire networks as a result of pathway formation between different electrodes                                                                                                                                                           | No                                  | Non invasive            | In operando                   | 3   |
| Lateral                            | Ag nanowire network                          | Infrared thermography | geometrically quantized percolation phenomenon via thermal/ electrical activation at the scale of the whole network (several millimeters)                                                                                                                                                            | No                                  | Non invasive            | In operando                   | 4   |

|          |                                                 |                                  |                                                                                                                                                                                         |                |                |                |    |
|----------|-------------------------------------------------|----------------------------------|-----------------------------------------------------------------------------------------------------------------------------------------------------------------------------------------|----------------|----------------|----------------|----|
| Lateral  | Au/MoS <sub>2</sub> /Ag                         | TEM                              | evolution dynamics of conductive filaments in planar ECM memristors                                                                                                                     | Yes            | Invasive       | In situ        | 5  |
| Vertical | Au/polyvinylimidazole/Ag/Au                     | Impedance spectroscopy           | ionic/ electronic transfer characteristics of the device                                                                                                                                | No             | Non invasive   | In operando    | 6  |
| Lateral  | Au/Ag nanostructures/Au                         | COMSOL Simulations               | anticipated percolation path with electric field application                                                                                                                            | Not applicable | Not applicable | Not applicable | 7  |
| Lateral  | Au/Ag nanostructures/Au                         | Impedance Spectroscopy           | stochastic resistive switching, and contribution of resistive, capacitive, and diffusion components for percolation path formation                                                      | No             | Non invasive   | In operando    | 8  |
| Lateral  | W/Ag nanoclusters in SiO <sub>2</sub> matrix/Au | TEM                              | fundamental electrochemical dynamics of metal inclusions inside conventional solid-state dielectrics                                                                                    | Yes            | Invasive       | In situ        | 9  |
| Lateral  | Ag nanowires                                    | Electrical resistance tomography | map the conductivity distribution in nanowire networks, and to image and track, over time, the evolution of potentiated localized regions in memristive samples exhibiting conductivity | No             | Non invasive   | In situ        | 10 |

|         |                         |      |                                                                                        |    |              |         |                     |
|---------|-------------------------|------|----------------------------------------------------------------------------------------|----|--------------|---------|---------------------|
|         |                         |      | plasticity                                                                             |    |              |         |                     |
| Lateral | Au/Ag nanostructures/Au | SERS | ascertaining the electric field induced morphological changes in the Ag nanostructures | No | Non invasive | Ex situ | <b>Present work</b> |

A comparison of different techniques employed for probing Ag conductive filament formation in Ag-based two-terminal devices is presented in Table S1. From the literature surveyed, it can be observed that SERS has not been utilized as a tool for gaining insights into the electric-field induced morphological changes. Therefore, SERS, being a non-invasive technique requiring minimal sample preparation, offers a promising approach for ex situ observation of the morphological changes.

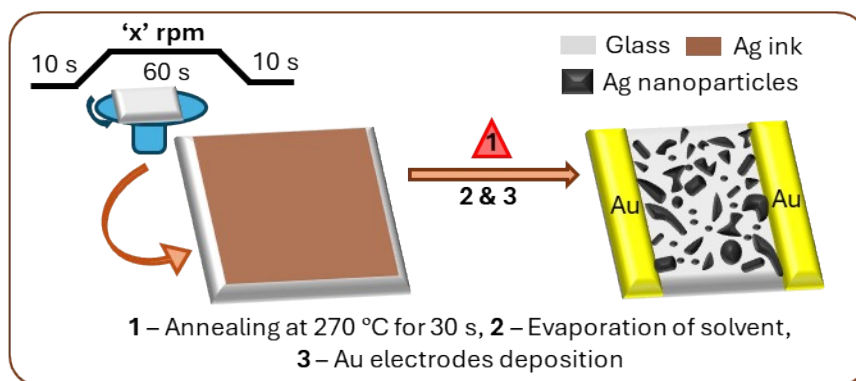

**Figure S1** Schematic of the Ag-ASN device fabrication protocol.

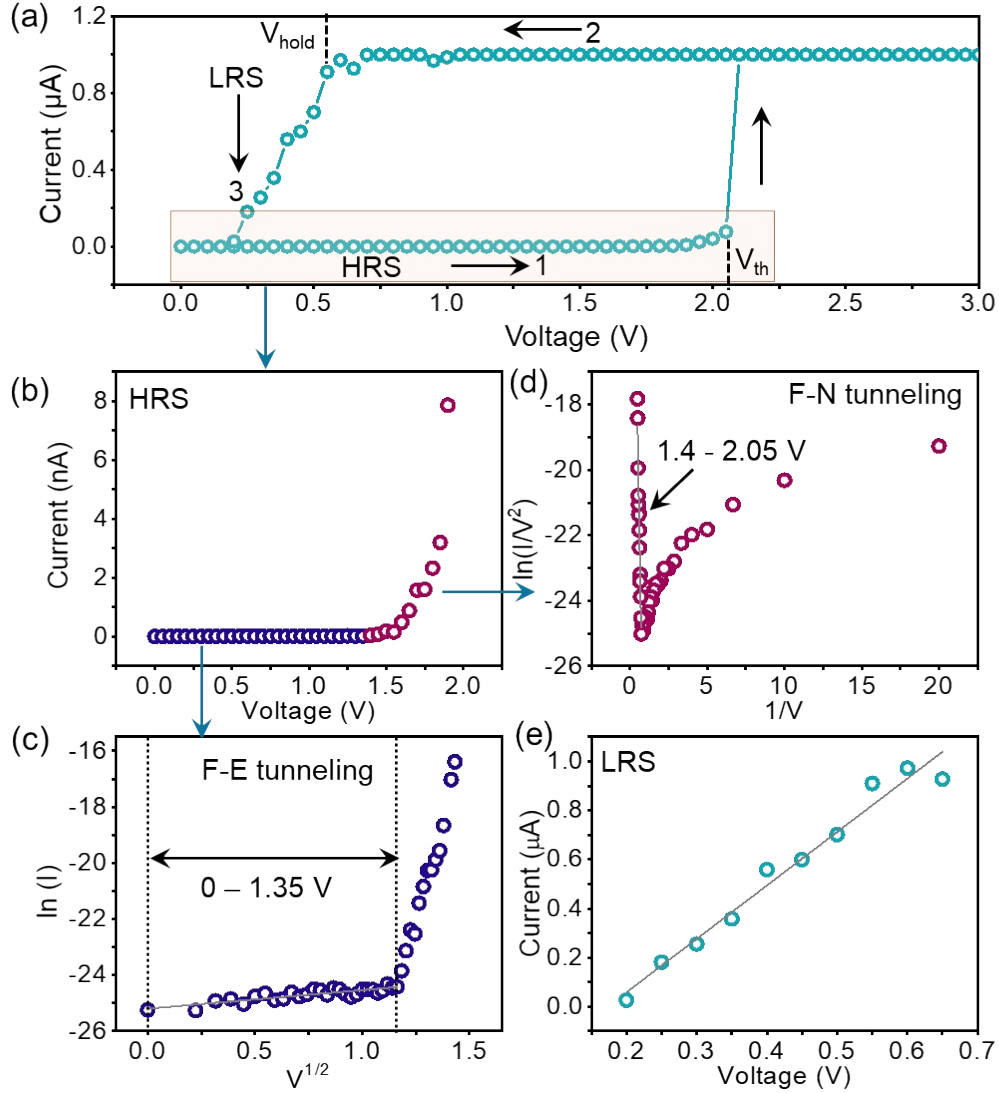

**Figure S2** (a) I-V sweep considered for understanding the current transport in the HRS and the LRS. (b) Magnified I-V sweep in the HRS during the forward sweep (colored region in (a)). HRS from 0-2.05 V during the forward sweep replotted as (c)  $\ln(I)$  versus  $V^{1/2}$  using equation 1 showing F-E tunnelling from 0 to 1.35 V (d)  $\ln(I/V^2)$  versus  $1/V$  using equation 2 showing F-N tunnelling from 1.4-2.05 V. (e) Linear relation between current and voltage showing an ohmic behavior in the LRS during the reverse sweep.

$$I \propto AT^2 \exp \left[ -\frac{q\phi}{kT} + q \left( \frac{q^3 V}{4\pi\epsilon} \right)^{\frac{1}{2}} \right] \quad [1]$$

$$I \propto V^2 \exp \left[ -\frac{kd}{V} \right] \quad [2]$$

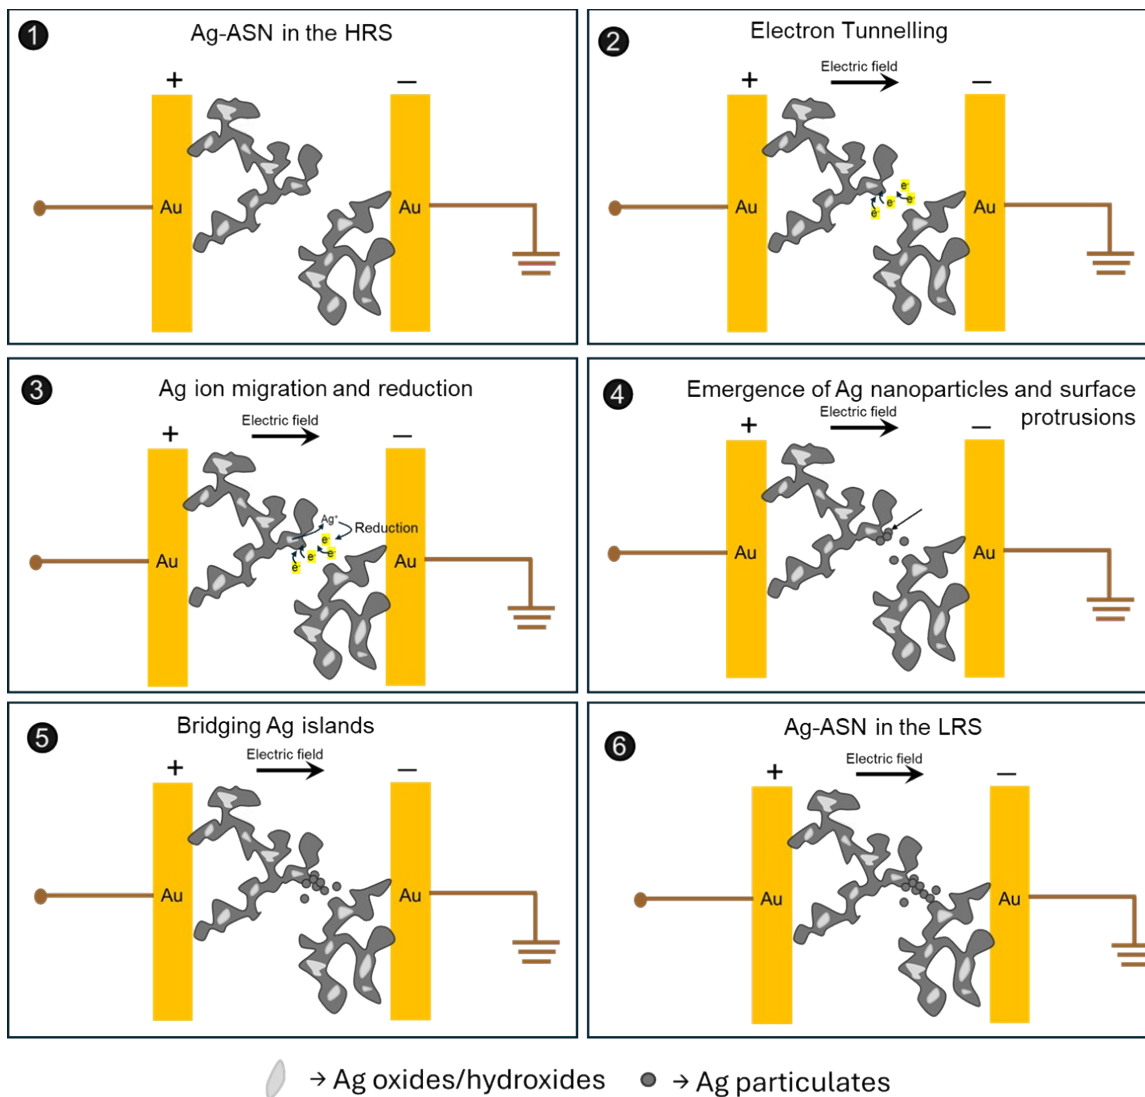

**Figure S3** Schematic of the switching mechanism – (1) initially, the Ag-ASN device is in the HRS, (2) – with the application of electric field, F-E, F-N tunnelling occur, (3) – the  $\text{Ag}^+$  ions drift along the Ag islands followed by reduction, (4) – leading to nucleation and emergence of nanoparticles, and protrusions, (5) – bridging the Ag islands, and (6) switching the device to the LRS.

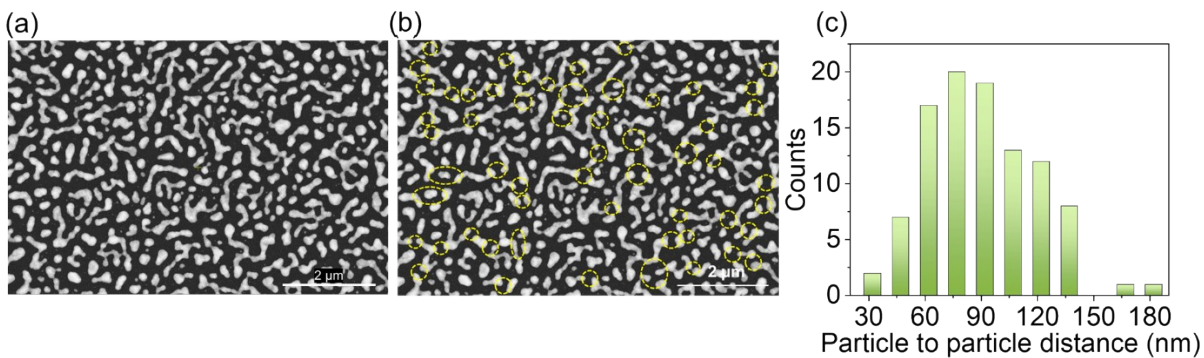

**Figure S4** (a) FESEM image used for COMSOL simulations. (b) Regions of sharp curvatures marked with yellow dotted circles. (c) Histogram showing the distribution of inter-structure distances.

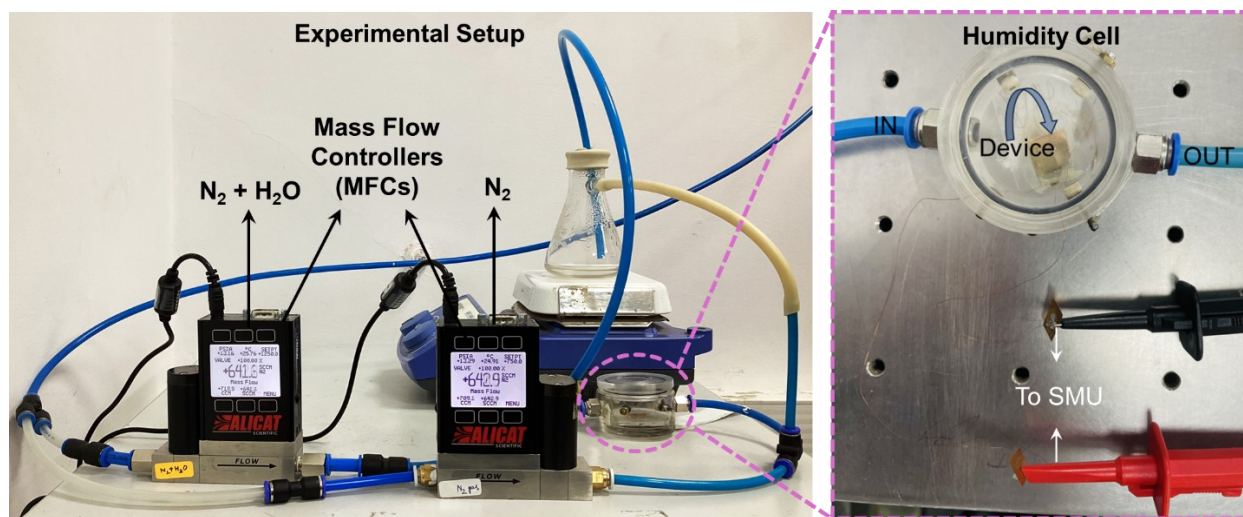

**Figure S5** Photograph of the experimental setup developed in-house for maintaining a particular humidity inside the humidity cell containing the device. Photograph of the device placed in the humidity cell with inlet and outlet for gas flow and the copper wire connections to the SMU for electrical measurements (right).

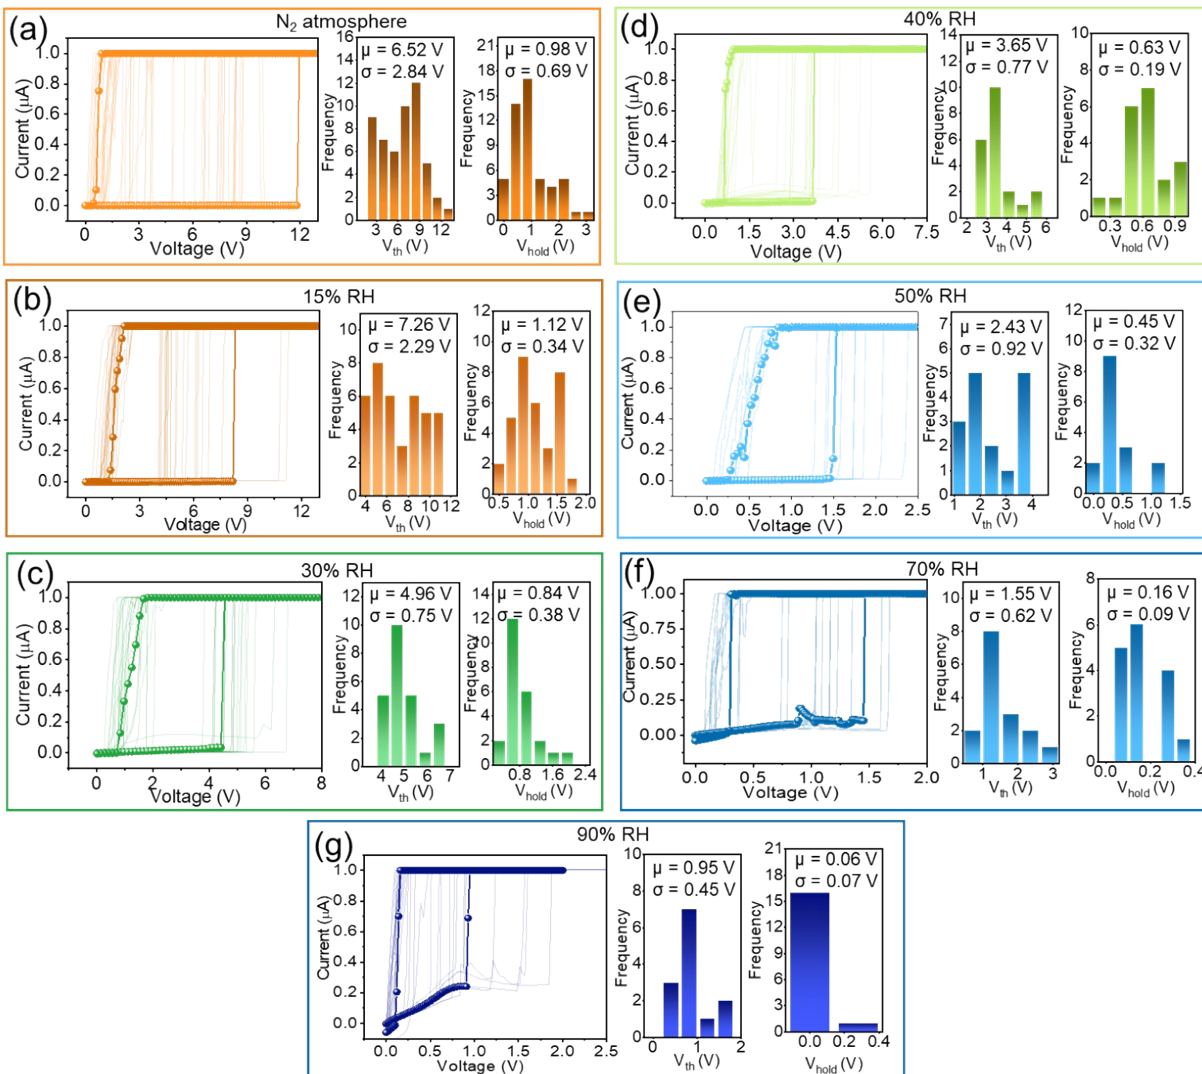

**Figure S6** Switching characteristics of the device under different RH conditions. One of the representative I-V sweeps among several is highlighted for the sake of clarity. Histograms show the variation of  $V_{th}$  and  $V_{hold}$  under various RH conditions. The mean  $\mu$  and deviation  $\sigma$  are mentioned in the inset.

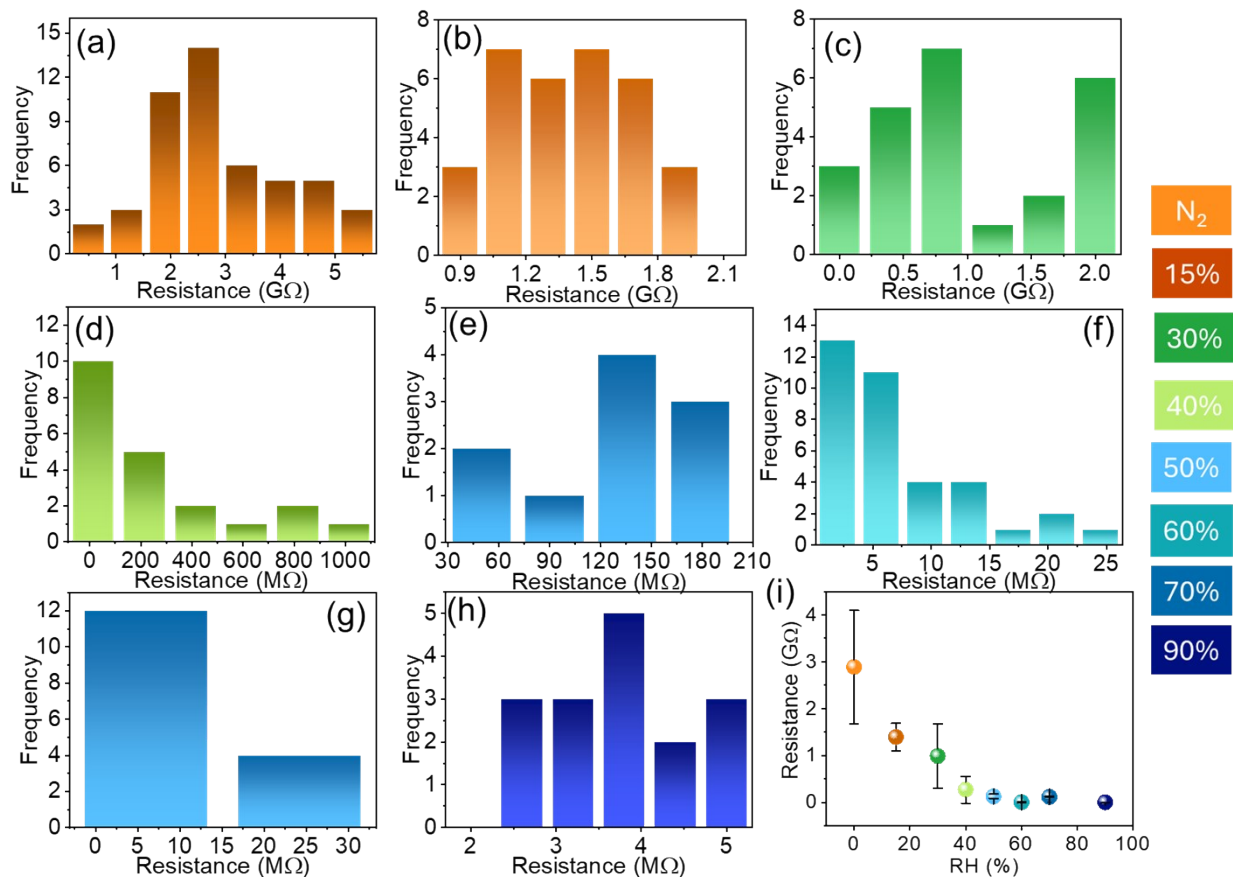

**Figure S7** (a-h) Histograms showing the distribution of HRS at different RH. The HRS is measured at 0.1 V during the reverse sweep. (i) Variation of resistance with RH.

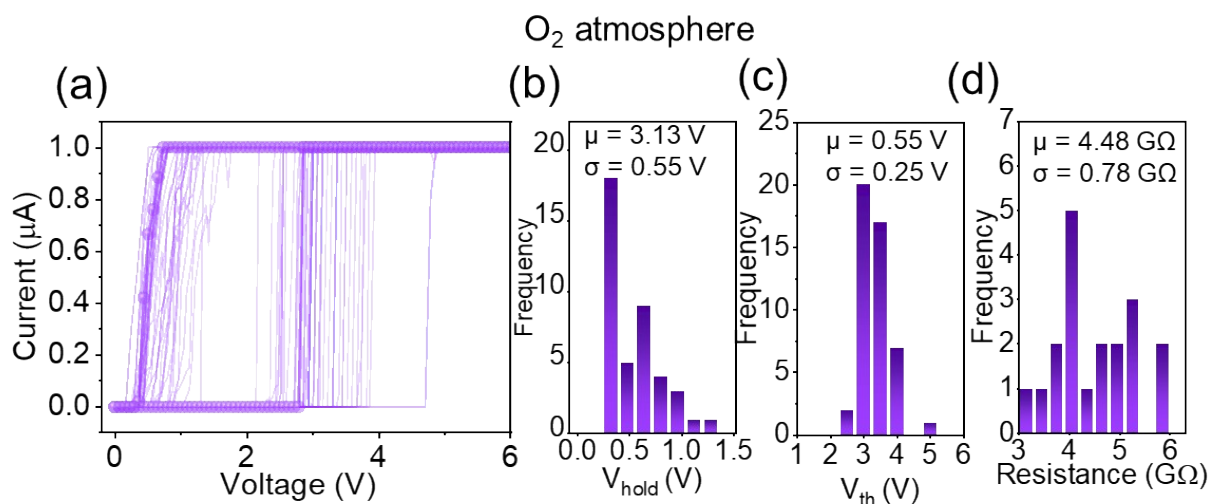

**Figure S8 O<sub>2</sub> atmosphere** (a) Switching behavior with one I-V sweep highlighted for clarity. Distribution of (b) V<sub>th</sub>, (c) V<sub>hold</sub>, and (d) HRS for ~ 35 I-V sweeps.

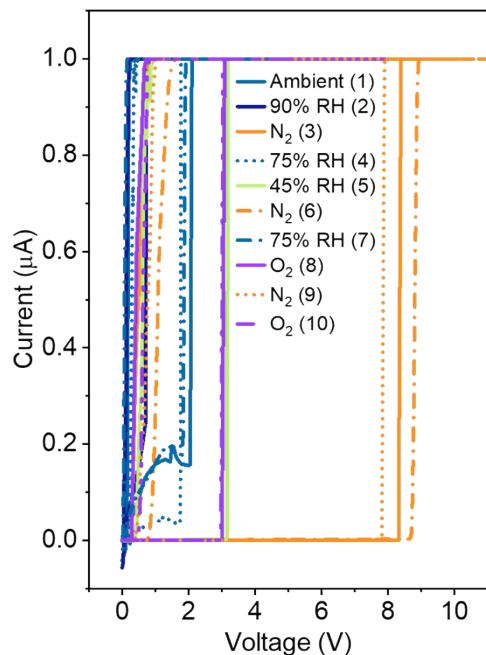

**Figure S9** Switching behavior of the device when randomly cycled between different atmospheres and RHs. The numbers 1 to 10 indicate the order of cycling between atmospheres.

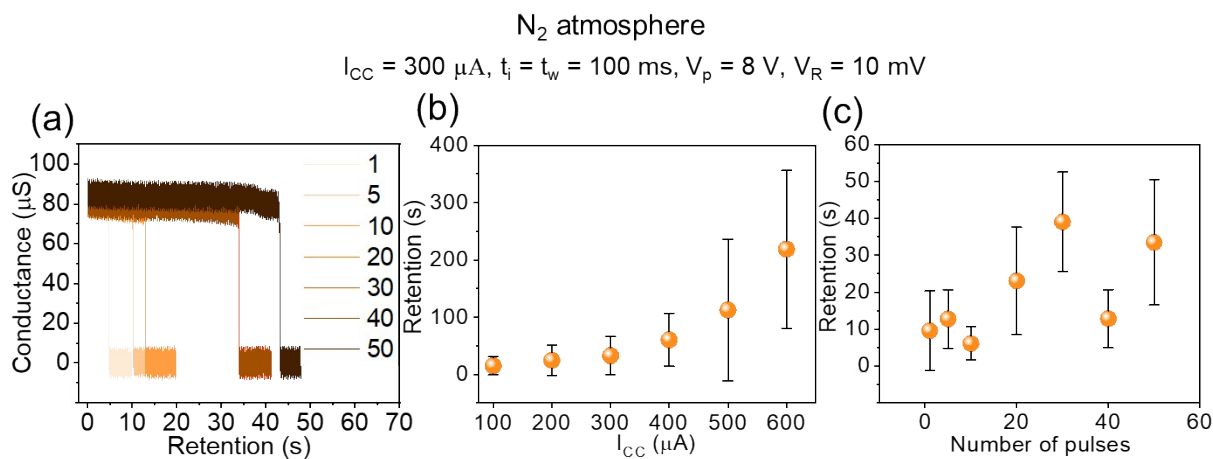

**Figure S10  $N_2$  atmosphere** (a) Retention of a G state achieved post-pulsing for varying number of pulses in the  $N_2$  atmosphere. Variation of (b) G and (c)  $t_r$  with the increase in the number of pulses. Error bars are based on 5 measurements.

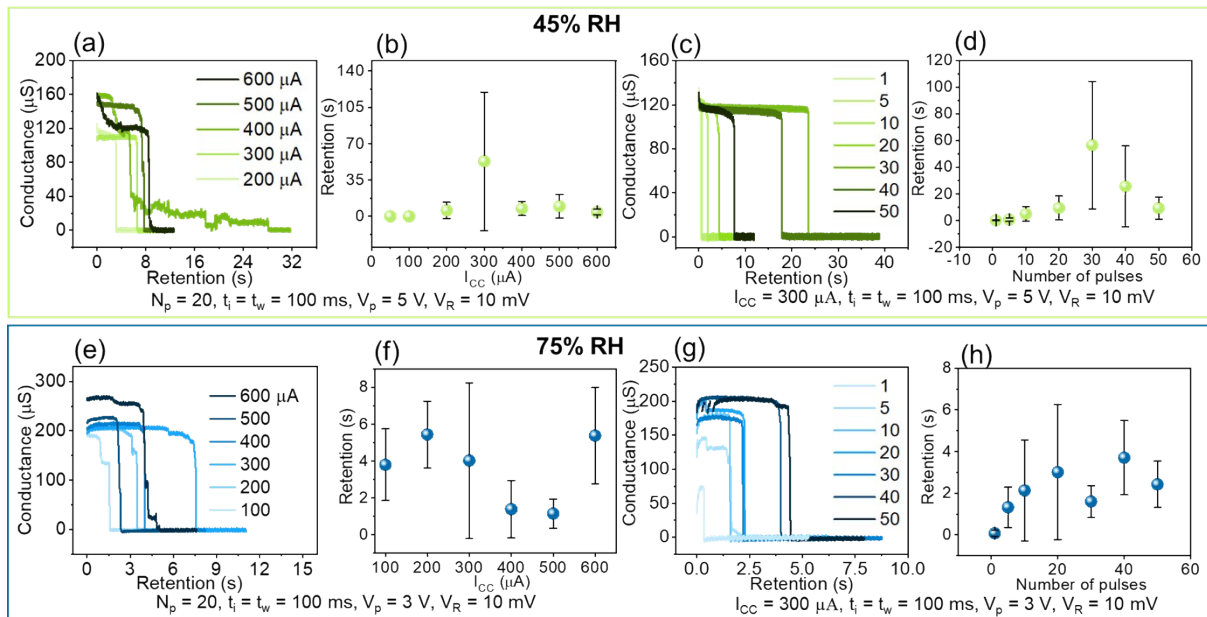

**Figure S11** Retention of a G state achieved post-pulsing for varying (a, e)  $I_{\text{CC}}$  and (c, g) number of pulses at 45% and 75% RH, respectively. Variation of  $t_r$  with increasing (b, f)  $I_{\text{CC}}$  and (d, h) the number of pulses at 45% and 75% RH, respectively. Error bars are based on 5 measurements.

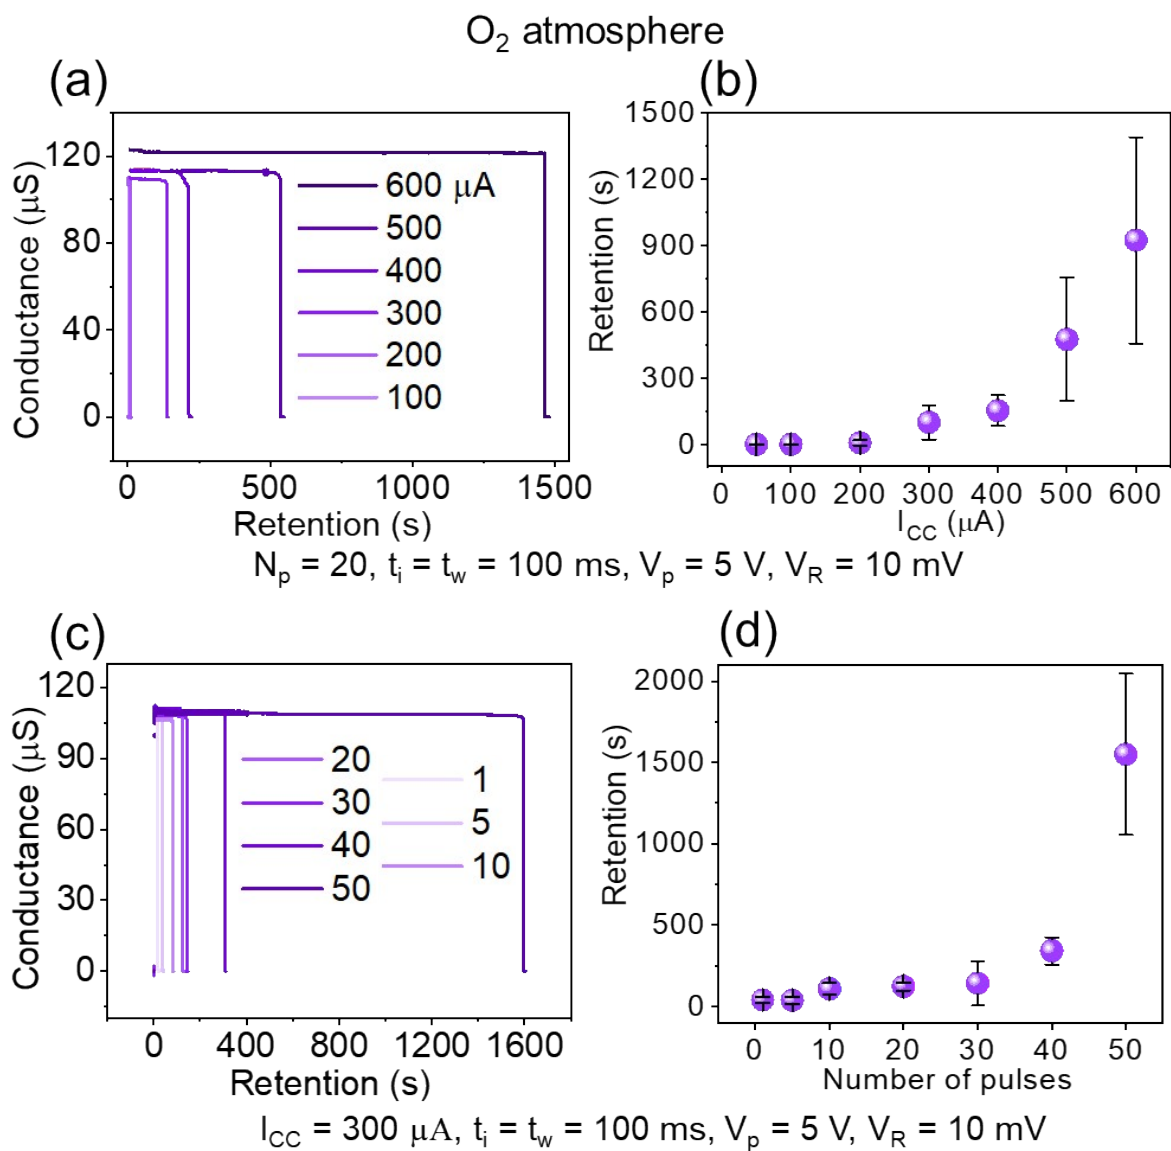

**Figure S12  $O_2$  atmosphere.** Retention of a G state achieved post-pulsing by varying (a)  $I_{CC}$  and (c) number of pulses. Variation of  $t_r$  with increasing (b)  $I_{CC}$  and (d) the number of pulses. Error bars are based on 5 measurements.

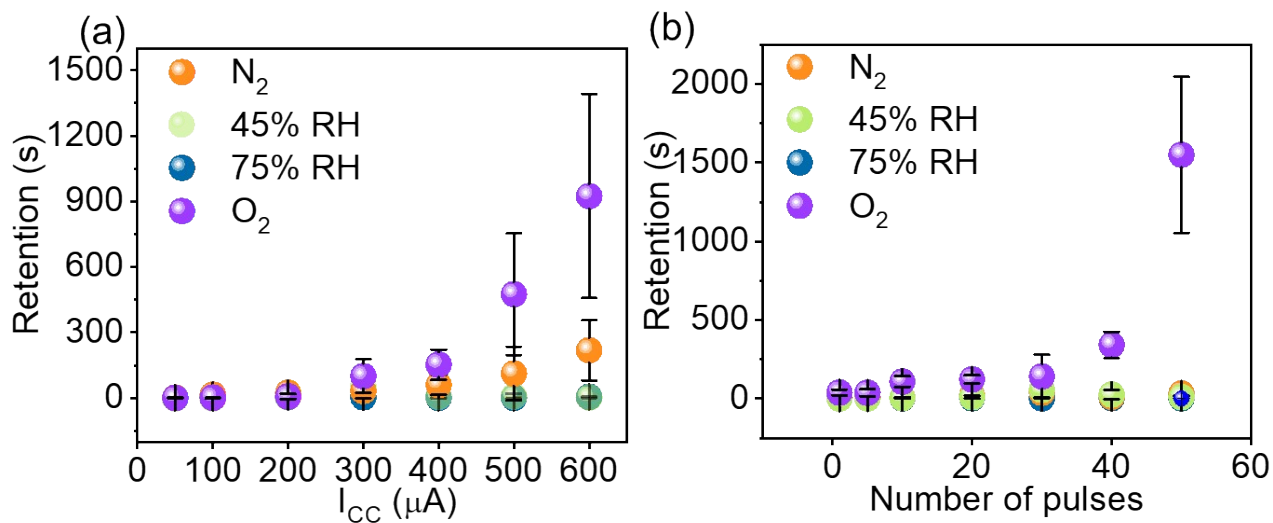

**Figure S13** Summary of the pulsing behavior of the device in  $\text{N}_2$ , 45% RH, 75% RH, and  $\text{O}_2$ . Variation in the  $t_r$  with (a)  $I_{CC}$  and (b) number of pulses ( $N_p$ ). The number of pulses ( $N_p$ ) in different conditions was varied from 1 to 50 at an  $I_{CC}$  of 300  $\mu\text{A}$ , with other parameters being the same as with varying  $I_{CC}$ .

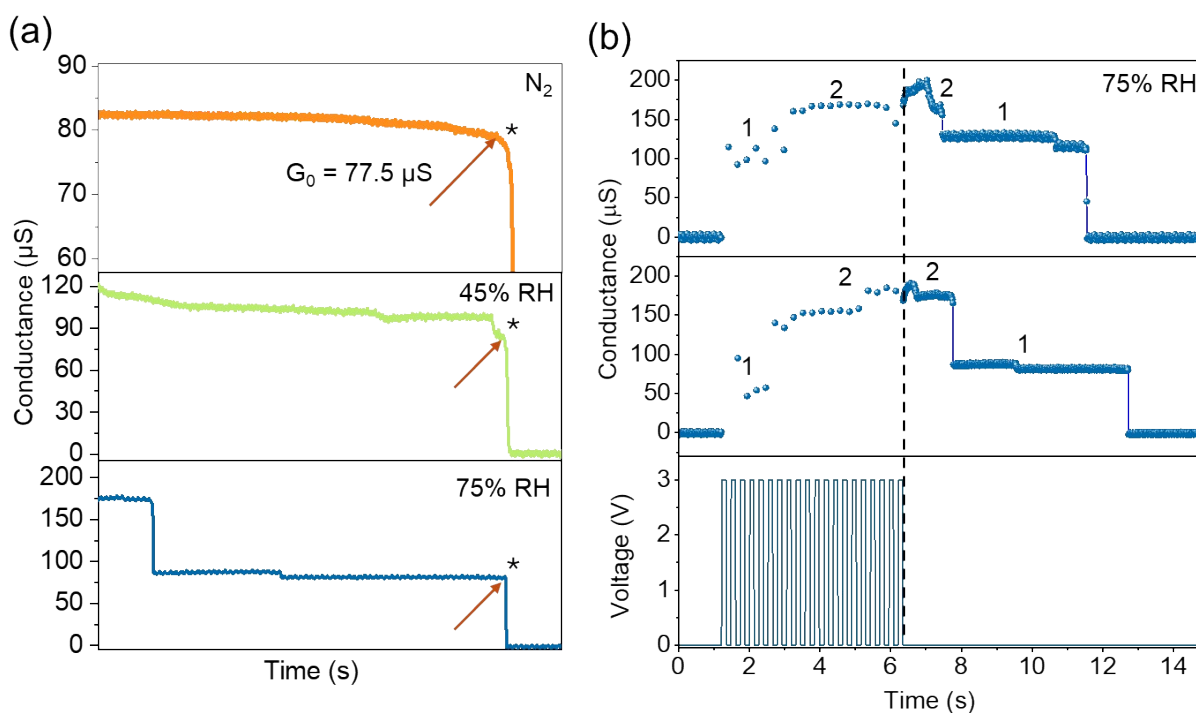

**Figure S14** (a) Near quantum conductance values exhibited during retention in the  $\text{N}_2$  atmosphere, 45% and 75% RH. (b) Bottom panel shows 20 voltage pulses ( $N_p$ ) of 3 V amplitude ( $V_p$ ) with  $t_i=t_w=100$  ms. The top panels show the response of the device in 75% RH for the applied voltage pulses and the behavior after pulsing. Stages 1 and 2 during pulsing reflect the retention stages 1 and 2 after pulsing, suggesting that retention 1 is due to the state achieved at stage 1 during pulsing. It can be observed that state 1 achieved during pulsing is stabilized and retained for a longer time,

as can be seen from retention state 1. Hence, it can be hypothesized that the filaments formed during the initial stages of pulsing get stabilized and retained for a longer time than those formed during the later stages of pulsing.

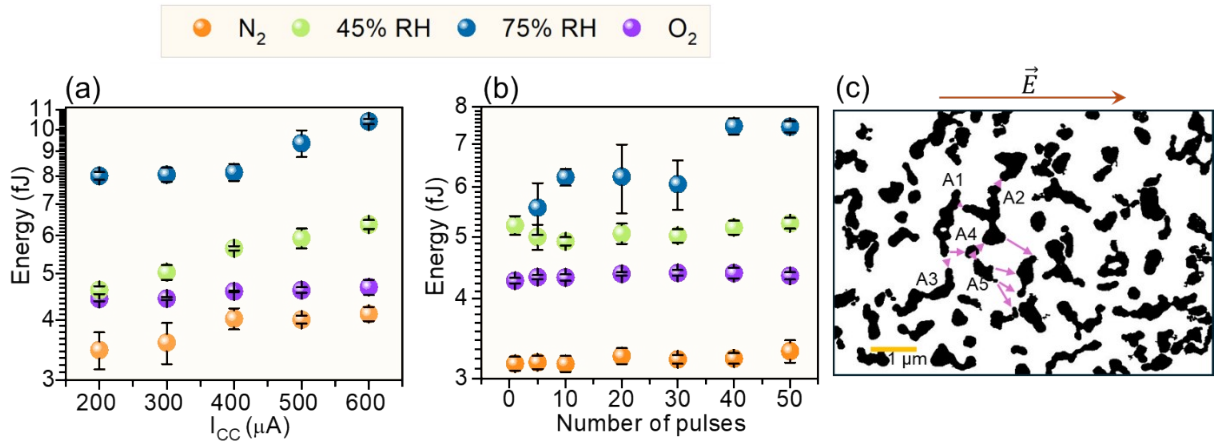

**Figure S15** Energy consumption per synapse with varying (a)  $I_{CC}$  and (b) number of pulses in different atmospheres. (c) FESEM binary image of agglomerates in the Ag-ASN, analyzed using ImageJ software. Each agglomerate (approximately) can connect with 2 to 4 agglomerates in the direction of the electric field, indicated with arrow marks for agglomerates marked A1, A2, A3, A4, and A5.

### Note S1

Energy consumption by a device was calculated using the equation: <sup>7</sup>

$$E_{\text{cons}} = I \times V \times t$$

$$= G \times V_R \times V_R \times t_i$$

Where  $G$  is the conductance state achieved post-pulsing,  $V_R$  is the reading voltage,  $t_i$  is the pulse interval.

The conductance values are taken from Figures 2e and f,  $V_R$  is 10 mV, and  $t_i$  is 100 ms.

However, to calculate energy consumption per synapse, 2 Ag agglomerates (area  $\geq 0.03 \mu m^2$ ) separated by the nanogap containing nanoparticles are considered as a single synapse.

Thus, the energy consumed to form a conduction path between 2 Ag agglomerates is calculated using the equations below;

Average Ag agglomerate density =  $\rho$  is 1 per sq.  $\mu m$ , which is  $\sim 1.5 \times 10^9$  per sq. inch.

Each Ag agglomerate has a possibility of connecting with 2 to 4 neighboring agglomerates approximately in the direction of the electric field, so  $n = 2$  to 4 (see Figure S13c)

Average synaptic junction density =  $N = \rho \times n = 3.1 \times 10^9$  per sq.inch

Energy consumed by a device  $E_{\text{cons}} = G \times V_R \times V_R \times t_i$

Energy density  $E_0 = E_{\text{cons}}/A$ , where  $A$  is the area of the device  $40 \times 5000 \mu m^2 \sim 3.1 \times 10^{-4}$  sq. inch

The fill factor of the Ag-ASN with only agglomerates is  $\sim 26\%$

Actual synaptic junction density  $N_0 = N \times f = \rho \times n \times f = 0.8 \times 10^9$  sq.inch

Energy consumed per synapse  $E_s = E_0/N_0 = (G \times V_R \times V_R \times t_i / A) / (\rho \times n \times f)$ .<sup>11</sup>

**Note S2**

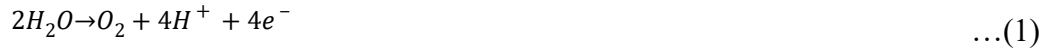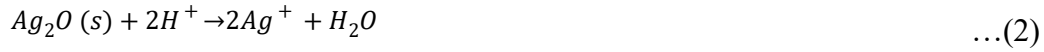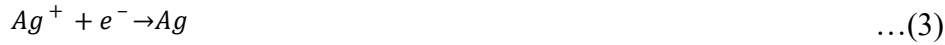

(1) is the anodic half reaction, and (3) is the cathodic half reaction.

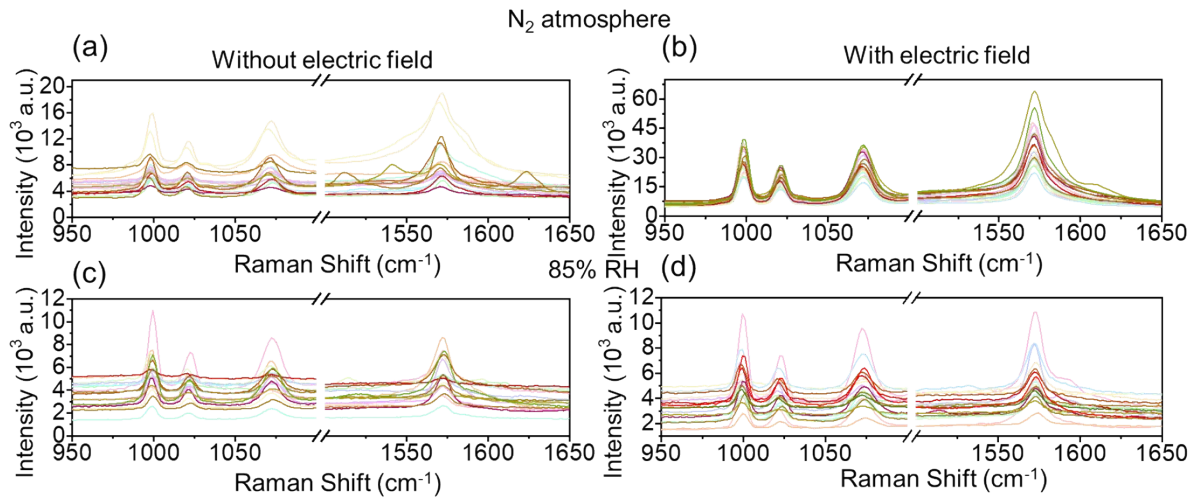

**Figure S16** Raman spectra ( $\lambda=532$  nm) (a, c) without (across  $D_{cd}$ ) and (b, d) with (across  $D_{ab}$ ) electric field application in the  $N_2$  atmosphere, and 85% RH, respectively.

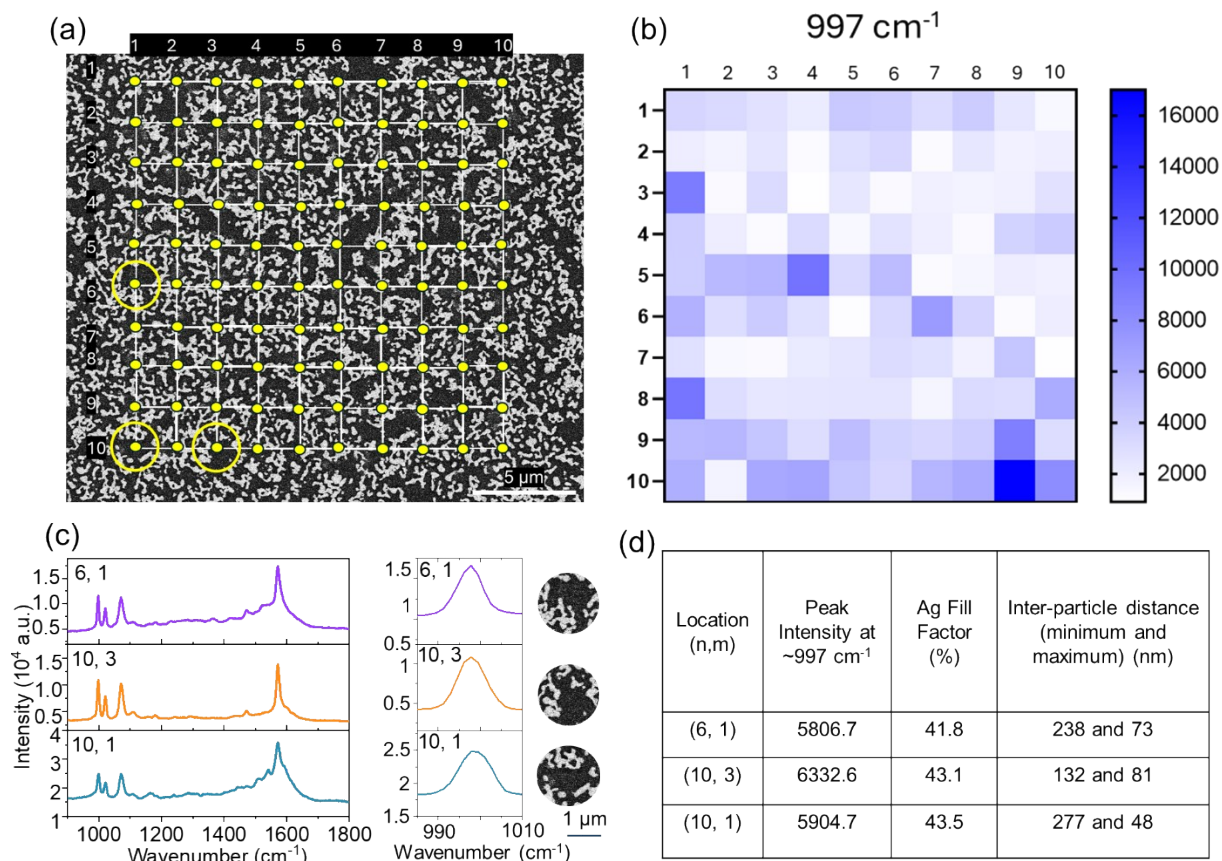

**Figure S17** (a) FESEM image with a grid of yellow dots each representing the centre of the region used for collecting the Raman spectra, and the big yellow circles mark the regions among them, exhibiting similar Raman signal intensities. (b) Pixelated view of the variation in the Raman peak intensity at  $\sim 997 \text{ cm}^{-1}$ . Scale bar represents the Raman intensity counts. (c) Raman spectra at three different locations mentioned in the inset showing similar Raman signals (left). Magnified view of the peak at  $\sim 997 \text{ cm}^{-1}$  (middle). FESEM images at the mentioned locations (right). (d) Tabulation of Raman and morphological parameters at the three locations.

Raman signals were obtained from different regions of the same Ag-ASN sample (see the FESEM image in Figure S17a overlaid with a data collection grid). We observe a spatial variation in the signal intensities of the characteristic thiophenol peak at  $\sim 997 \text{ cm}^{-1}$  (see the color mapping in Figure S17b). For comparison, three spectra were considered with similar peak intensities, and their morphological parameters obtained through FESEM images were compared (see spectra and FESEM images in Figure S17c). The laser spot from the Raman spectrometer with a 50x objective covers  $\sim 3 \mu\text{m}^2$  area. Accordingly, the morphological regions were identified. The locations (6, 1) and (10, 1) showed similar peak intensities. The microscopic image analysis from these regions gave similar fill factors (area of Ag coverage) and range of inter-particle distances. At location (10, 3), the Raman peak intensity was slightly higher, which was also reflected in its inter-particle distance, though the fill factor was comparable with that at locations (6, 1), and (10, 1) (see table

in Figure S17d). These observations show that inter-particle distances play an important role in determining SERS signal intensities. The variations in the peak intensities can also arise from the analyte molecule distribution, sharp curvatures on the Ag islands/particles, and the proximity of hotspots (if the inter-particle distance is less, the possibility of hotspots in proximity is higher).

### Note S3

#### SERS Factor Calculation

The enhancement factor is calculated using the formula.<sup>12</sup>

$$\text{SERS Factor} = \left( \frac{I_{\text{SERS}}}{I_{\text{Norm}}} \right) \left( \frac{N_{\text{Bulk}}}{N_{\text{Surf}}} \right)$$

Where,

$I_{\text{SERS}}$  is the intensity of the specific band in the SERS spectra

$I_{\text{Norm}}$  is the intensity of the specific band in the normal Raman spectra of the analyte molecule

$N_{\text{Bulk}}$  is the number of probe molecules illuminated under the laser beam in the bulk

$N_{\text{Bulk}} = \frac{A \times h \times \rho}{m}$  where  $A$  is the laser spot size,  $h$  is the penetration depth (100  $\mu\text{m}$ ),  $\rho$  is the density of thiophenol (1.08  $\text{g}/\text{cm}^3$ ) and  $m$  is the molecular weight of thiophenol (110.19  $\text{g}/\text{mol}$ )

$N_{\text{SERS}}$  is the number of probe molecules illuminated under the laser beam in the SERS experiments

$N_{\text{SERS}} = C \times A$  where  $C$  is the surface density of thiophenol ( $6.8 \times 10^{14}$  molecules/ $\text{cm}^2$ ),  $A$  is the laser spot size

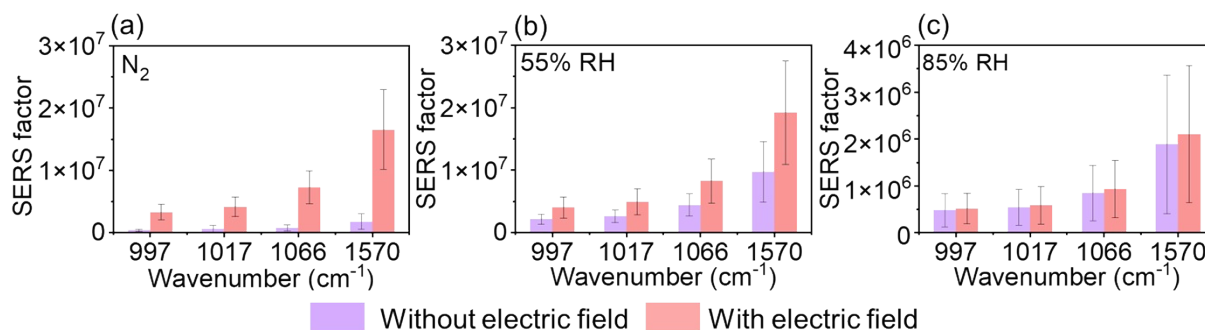

**Figure S18** SERS factor of the prominent thiophenol peaks without and with electric field application in the (a) N<sub>2</sub> atmosphere, (b) 55%, and (c) 85% RH. Error bars are derived from 99 spectra along the device length.

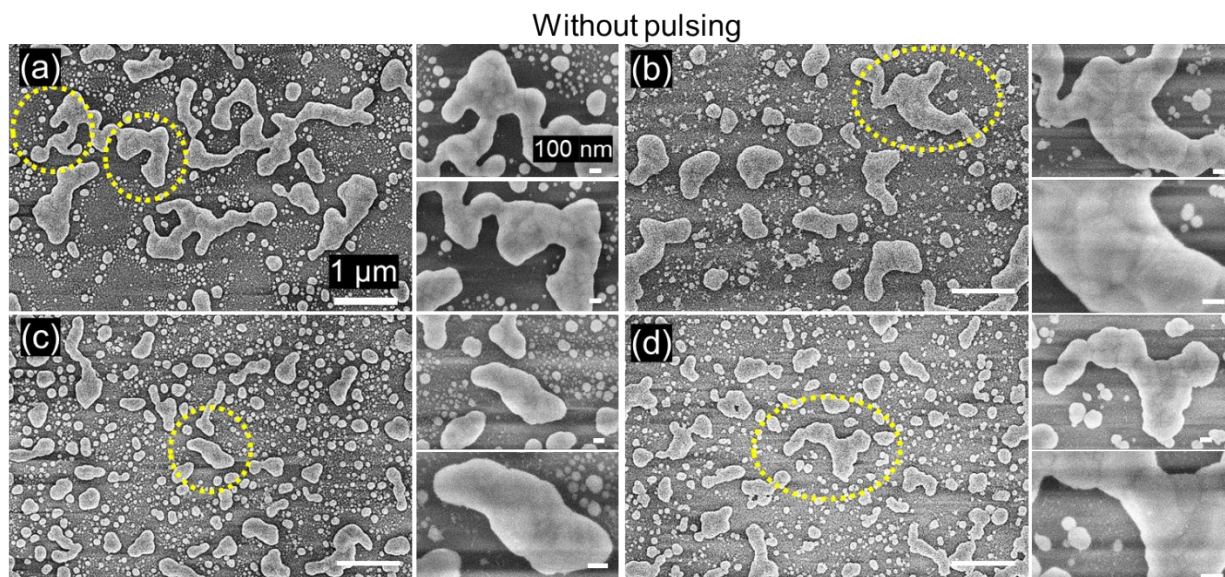

**Figure S19** FESEM images in  $D_{cd}$  without pulsing treatment, where yellow circles show the region magnified on the right in (a) the  $N_2$  atmosphere, (b) at 55% RH, (c, d) at 85% RH. Scale bar in (a) applies to all the figures.

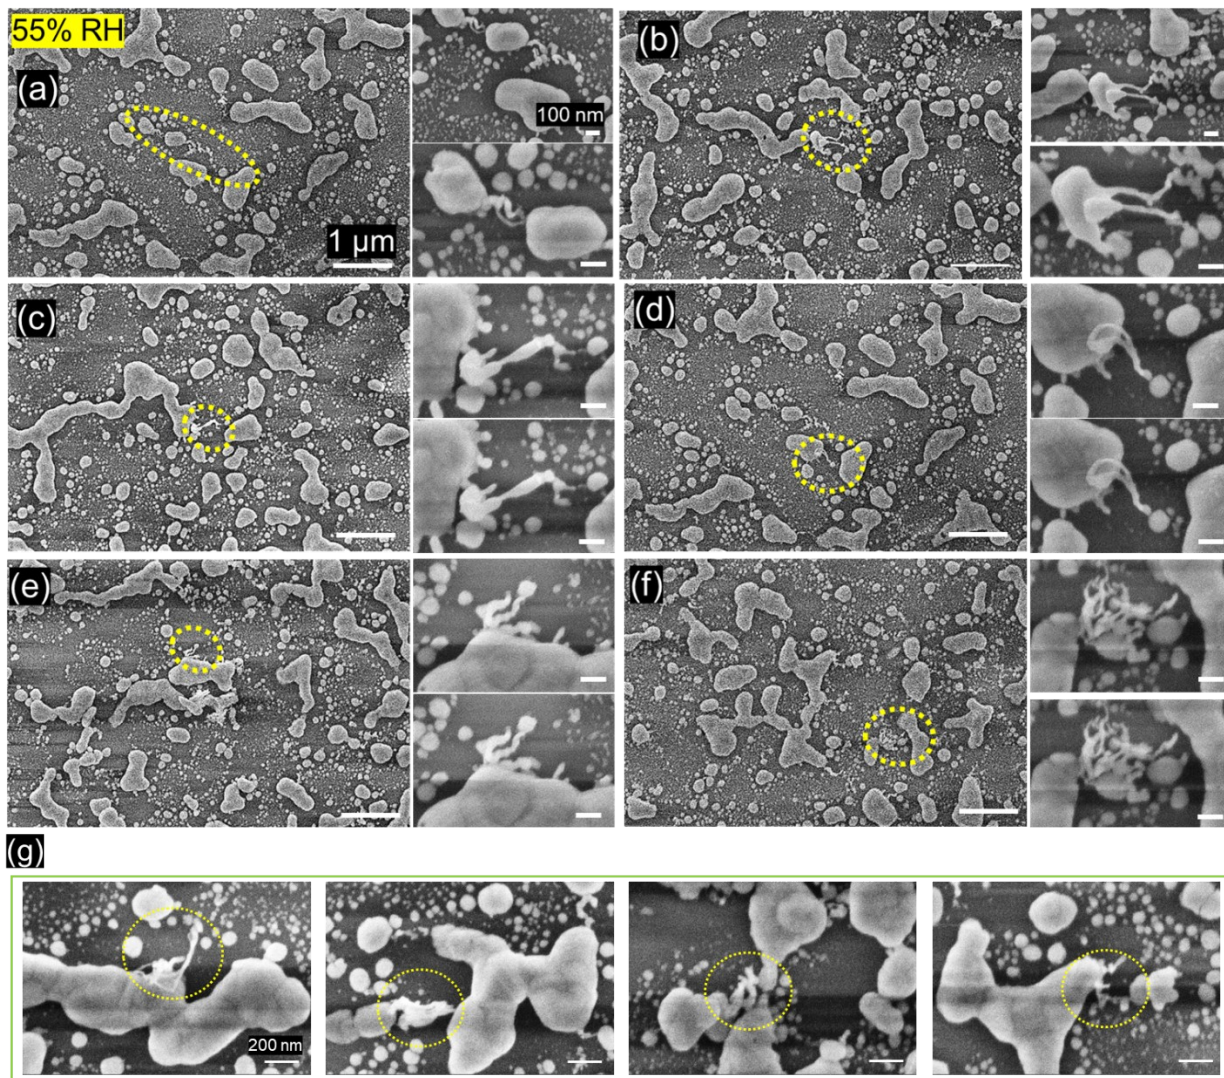

**Figure S20** FESEM images in  $D_{ab}$  with electric field treatment at 55% RH, with magnified images showing the protrusions on the Ag structures and directed conduction paths. The scale bar in (a) applies to others. (g) Magnified FESEM images showing protrusions.

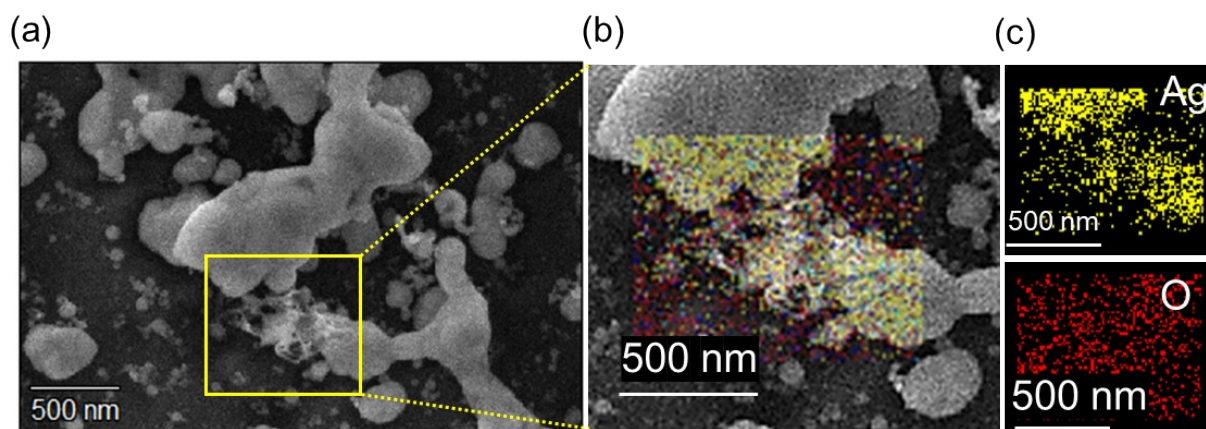

**Figure S21** (a) FESEM image showing the dendritic/hairy growth between Ag particles. (b) EDS color mapping showing the elemental composition in the marked region containing the hairy structure. (c) Elemental mapping showing the Ag and O composition in the marked region.

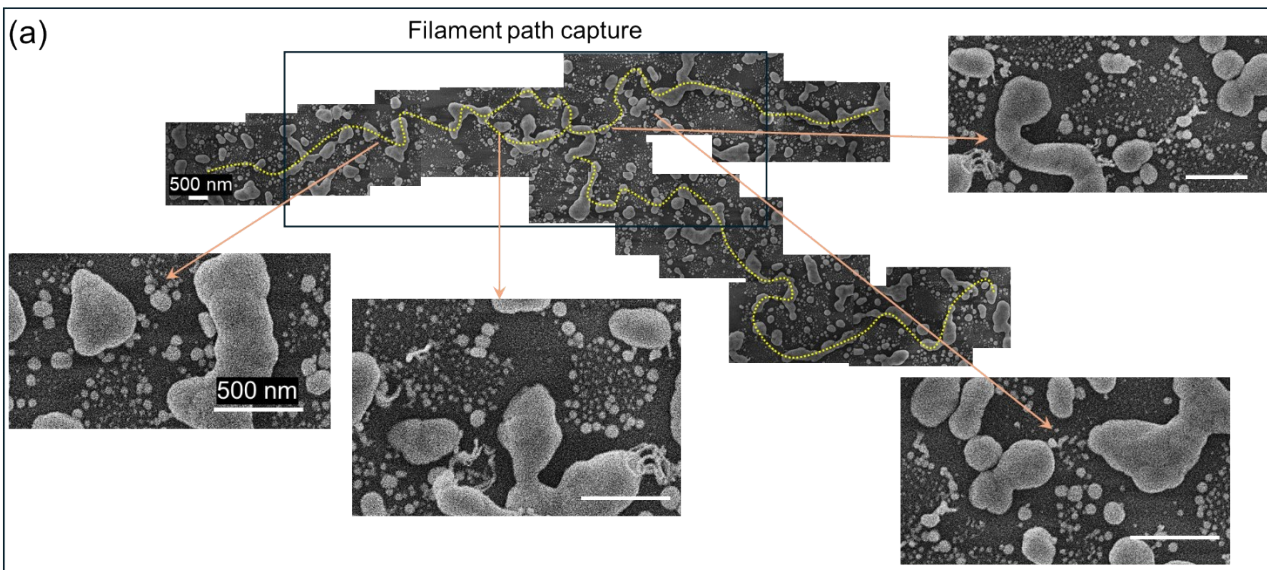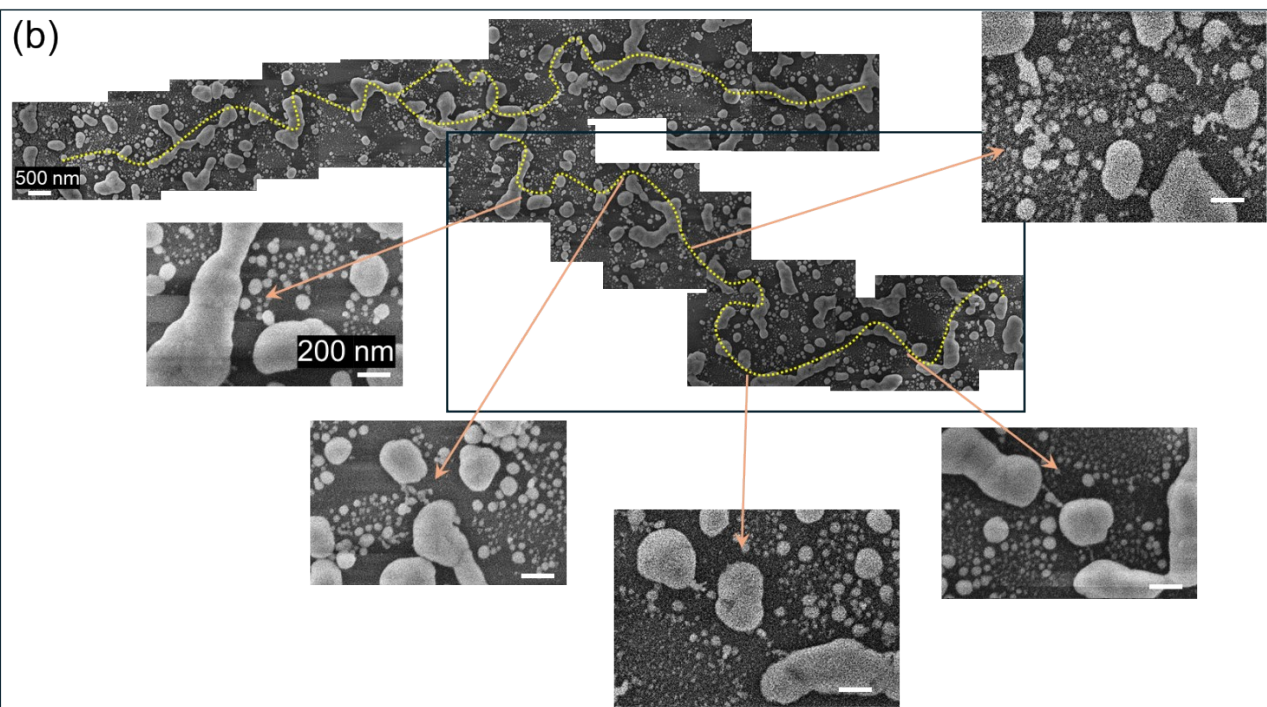

**Figure S22** (a-b) Filamentary conductive paths in the device pulsed at 55% RH. Scale bar on one of the magnified images in (a) and (b) applies to all the images.

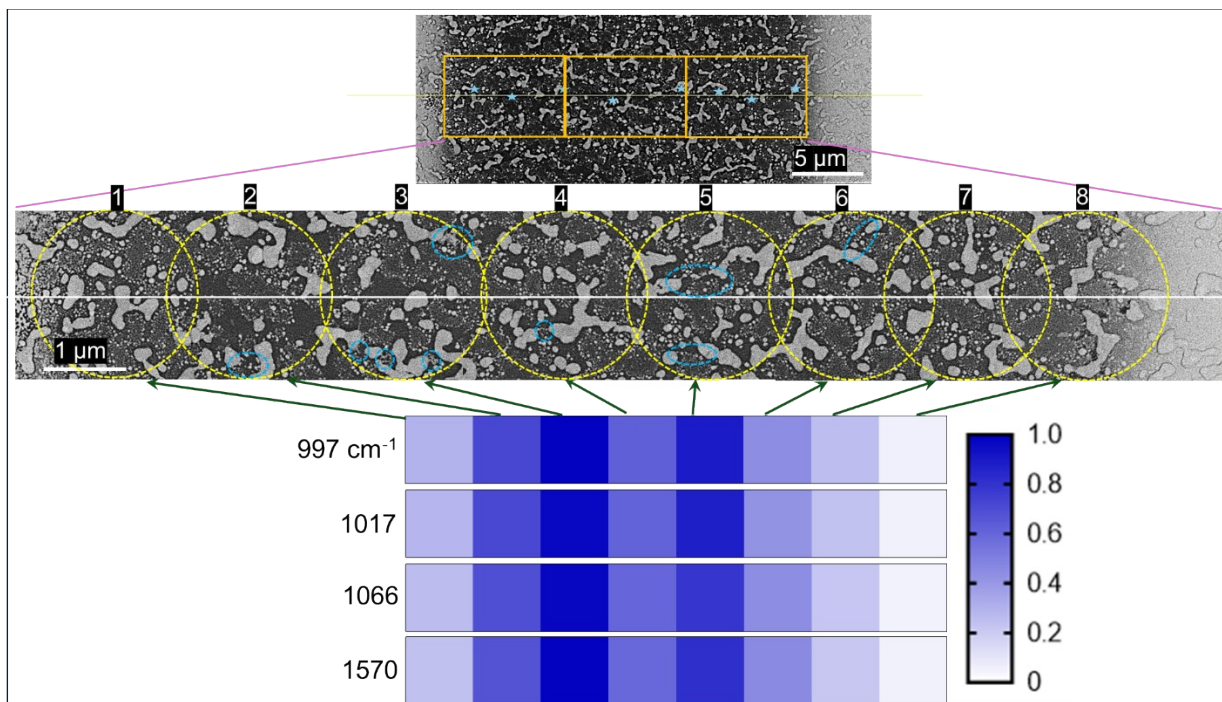

**Figure S23** FESEM image of the region where the Raman spectra are captured after pulsing at 55% RH, with the star markers indicating the centre of the laser spot. Middle: magnified FESEM image with the dotted circles marking the region where the spectra have been captured. Bottom: the spectral color map corresponding to the marked regions of the prominent thiophenol peaks. Scale bar represents normalised Raman intensity counts.

The increased peak intensity in the pulsed device is correlated with the microscopic images to confirm the possible reason for the peak enhancement. Figure S23 shows the FESEM image of the region where the Raman spectra were captured, with the yellow dotted circles indicating the approximate region of the individual spectrum. The spectral color map shows the thiophenol peak intensity variation across the region. The blue dotted circles indicate the protrusions or paths created due to pulsing. Accordingly, regions 3 and 5 show the highest peak intensities, and it can be observed that there are more directed paths and protrusions in those regions, contributing to SERS hotspots possibly. This serves as evidence that the morphological change in the device is directly affecting the SERS intensity.

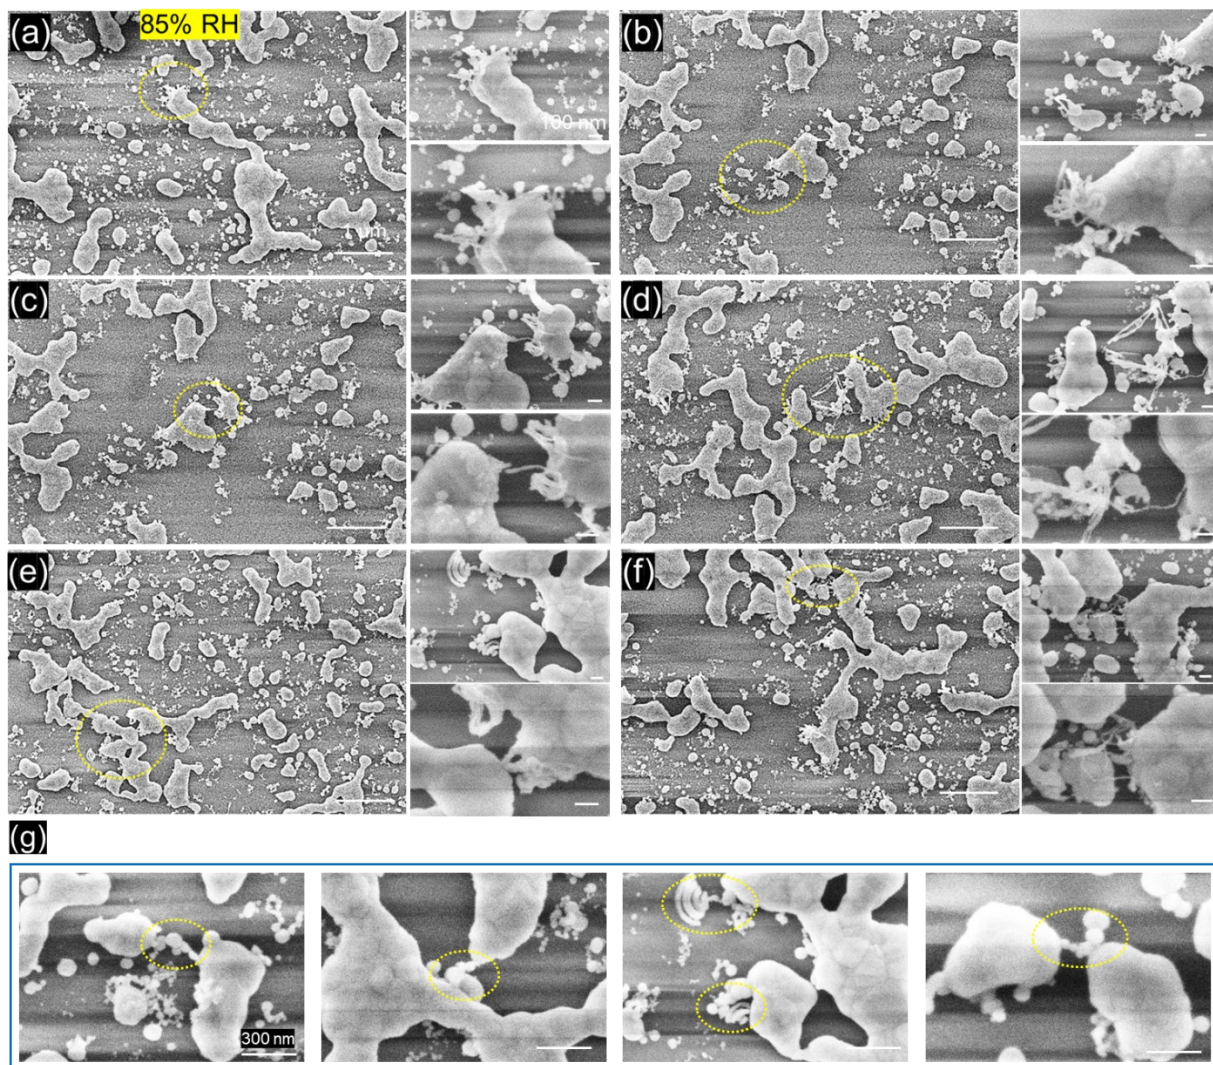

**Figure S24** (a-f) FESEM images in  $D_{ab}$  with electric field treatment at 85% RH, with magnified images showing the protrusions on the Ag structures and directed filamentary paths. (g) Magnified FESEM images showing protrusions. Scale bar in (a) applies to all the other images.

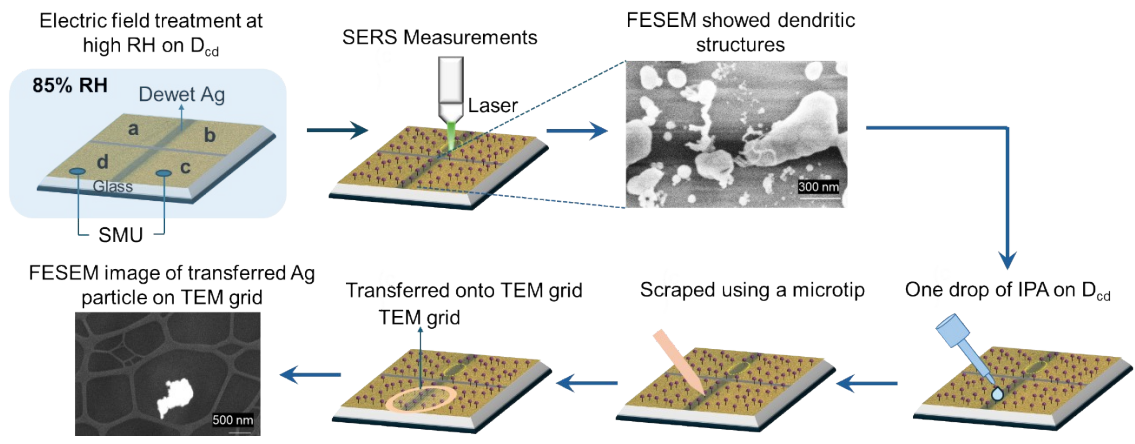

**Figure S25** Sample preparation process for TEM characterization

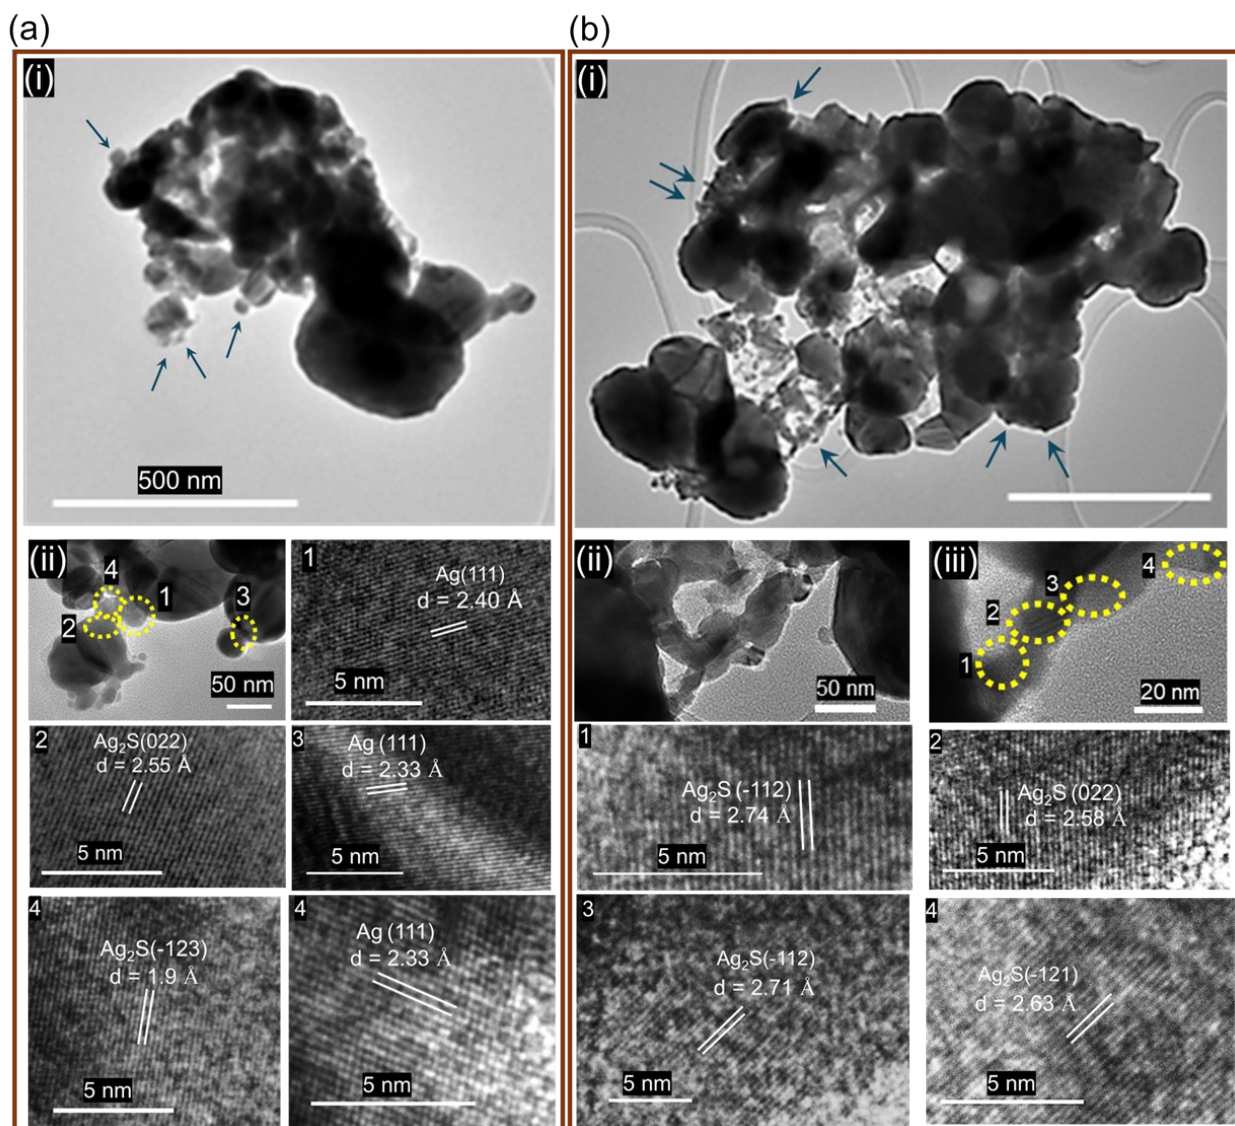

**Figure S26** (a-i and b-i) TEM images showing the filamentary outgrowths marked with the blue arrows. The scale bar in (a) applies to (b). (a-ii, b-ii, and b-iii) Magnified TEM images with the yellow dotted circles in a-ii and b-iii showing the regions where the d-spacings are calculated, marked as 1,2,3, and 4. The HRTEM images, along with the calculated d-spacing and its corresponding lattice planes, are shown from the regions marked 1,2,3, and 4.

#### Note S4

All the parameters ( $V_{th}$ ,  $V_{hold}$ ,  $t_r$ ,  $G$ , and SERS factor) in the spider chart (Figure 6) are normalized with respect to the highest value. For example,  $V_{th}$  was the highest in the low RH conditions and was considered 1, and  $V_{th}$  in the intermediate RH, high RH, and in the O<sub>2</sub> atmospheres were normalized with respect to it. Similarly, other parameters were normalized with respect to the highest value. Also, the  $t_r$  and  $G$  values are taken from the data obtained with the application of 20 pulses, and at an  $I_{CC}$  of 600  $\mu$ A.

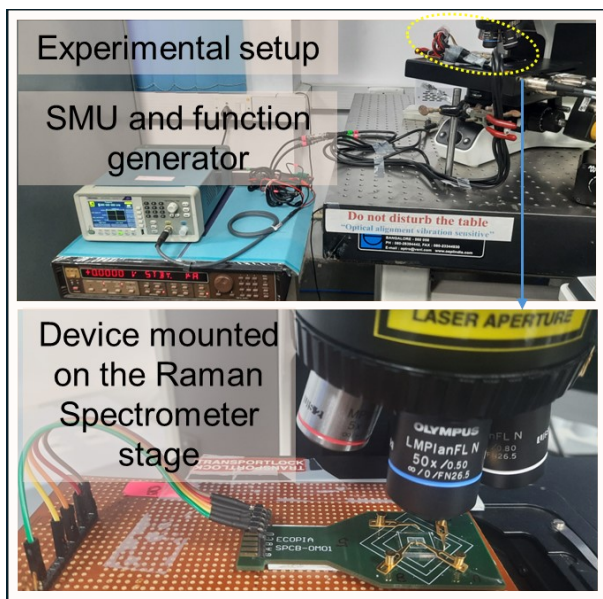

**Figure S27** Photograph of the setup, showing the device on a probe card atop the Raman spectrometer stage, connected to the SMU and function generator. A magnified view of the mounted device is shown below.

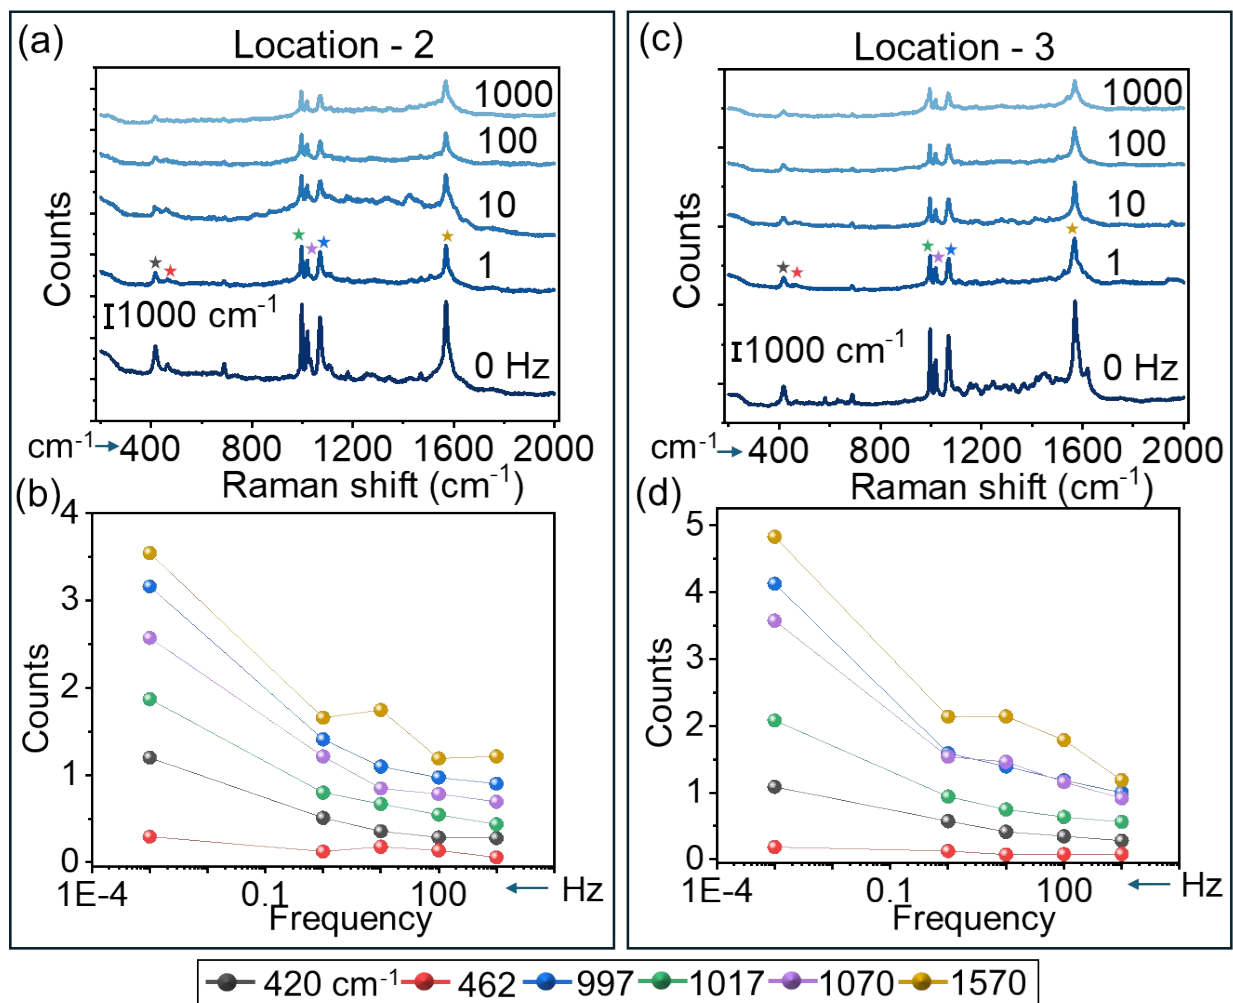

**Figure S28** (a, c) Raman spectra at different locations under varying electric field frequencies, color-coded as shown at the top. Star markers indicate the color codes used for showing the variations in peak intensities corresponding to the applied electric field frequency in (b, d). (b, d) Peak intensity variation of prominent thiophenol Raman peaks with electric field frequency at different locations, color-coded as shown at the bottom.

#### References:

- 1 V. N. A. A. Samsonova, V. Dremov, O. Klimenko, N. Brilliantov, Investigation of filamentation in a-Si/Ag/Cu memristors with atomic force microscope, *arxiv Prepr.*, 2026, **arXiv:2605**, 1–13.
- 2 C. Hung, C. Chi, K. Hsiao and M. Lu, In Situ Scanning Transmission Electron Microscopy / Transmission Electron Microscopy Study of Defect-Driven Ag Ion Dynamics and Filament Evolution in CuO Nanowire-Based Memristors, *ACS Appl. Mater. Interfaces*, 2026, **18**, 2078–2087.
- 3 Q. Li, A. Diaz-Alvarez, R. Iguchi, J. Hochstetter, A. Loeffler, R. Zhu, Y. Shingaya, Z. Kuncic, K. ichi Uchida and T. Nakayama, Dynamic Electrical Pathway Tuning in Neuromorphic Nanowire Networks, *Adv. Funct. Mater.*, 2020, **30**, 2003679.

- 4 T. Sannicolo, D. Muñoz-Rojas, N. D. Nguyen, S. Moreau, C. Celle, J. P. Simonato, Y. Bréchet and D. Bellet, Direct Imaging of the Onset of Electrical Conduction in Silver Nanowire Networks by Infrared Thermography: Evidence of Geometrical Quantized Percolation, *Nano Lett.*, 2016, **16**, 7046–7053.
- 5 C. Li, T. Xu, R. Pan, S. Bao, K. Yin, J. Shen, Y. Zhu, S. Hou and L. Sun, Electric Field-Dependent Evolution Dynamics of Conductive Filaments in 2D Material-Based Planar Memristors, *ACS Nano*, 2024, **18**, 32196–32204.
- 6 K. Krishnan and S. Vijayaraghavan, Unraveling the Atomic Redox Process in Quantum Conductance and Synaptic Events for Neuromorphic Computing, *Adv. Electron. Mater.*, 2022, **8**, 2200509.
- 7 M. Pal, M. Kaur, B. Yadav, A. Bisht and G. U. Kulkarni, A Self-Formed Ag Nanostructure Based Neuromorphic Device Performing Arithmetic Computation and Area Integration: Influence of Presynaptic Pulsing Scheme on Mathematical Precision, *ACS Appl. Mater. Interfaces*, 2025, **17**, 5239–5253.
- 8 Tejaswini S. Rao, Ritu Gupta, and G. U. Kulkarni, Unraveling Stochastic Dynamics and Switching Mechanism in Ag Network-Based Neuromorphic Device, *Small*, 2025, **21**, 2502771.
- 9 Y. Yang, P. Gao, L. Li, X. Pan, S. Tappertzhofen, S. Choi, R. Waser, I. Valov and W. D. Lu, Electrochemical dynamics of nanoscale metallic inclusions in dielectrics, *Nat. Commun.*, 2014, **5**, 4232.
- 10 A. Cultrera, G. Milano, C. Ricciardi, L. Callegaro, I. Nazionale and M. Inrim, Mapping and Tracking Conductivity in Memristive Nanowire Networks with Electrical Resistance Tomography, *IEEE Open J. Instrum. Meas.*, 2026, 1.
- 11 R. Attri, I. Mondal, B. Yadav, G. U. Kulkarni and C. N. R. Rao, Neuromorphic devices realised using self-forming hierarchical Al and Ag nanostructures : towards energy-efficient and wide ranging synaptic, *Mater. Horizons*, 2024, **11**, 737–746.
- 12 R. Gupta, S. Siddhanta, G. Mettela, S. Chakraborty, C. Narayana and G. U. Kulkarni, Solution processed nanomanufacturing of SERS substrates with random Ag nanoholes exhibiting uniformly high enhancement factors, *RSC Adv.*, 2015, **5**, 85019–85027.
